# Supplementary material
Source: MDPI journal article supplement (https://www.mdpi.com/2077-0472/13/5/1030)
Supplement: s1 [file s1]

## Supplementary Materials:

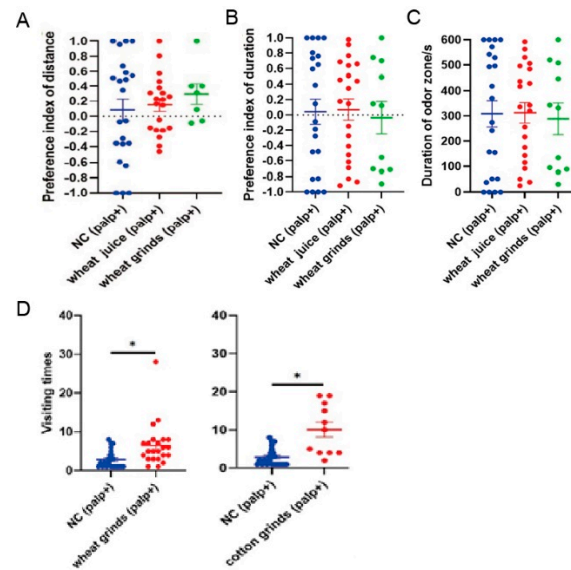

**Figure S1.** Characterization of novel DER behavioral assay. A: Preference index defined with total moving distance of locusts to single stimulation of NC, wheat juice or wheat grinds, respectively. Palp+: antennae-ablated locusts. One-way ANOVA with Fisher's LSD multiple comparisons test, n=7-22. B: Preference index defined with total moving duration of locusts to single stimulation of NC, wheat juice or wheat grinds, respectively. One-way ANOVA with Fisher's LSD multiple comparisons test, n=11-22. C: Total moving duration of locusts in each odor zones containing NC, wheat juice and wheat grinds. One-way ANOVA with Fisher's LSD multiple comparisons test, n=11-22. D: Total visiting times of locusts in each zone of two-choice assay between NC and wheat grinds, or between NC and cotton grinds. Unpaired t-test, n=11-23. \* p<0.05.

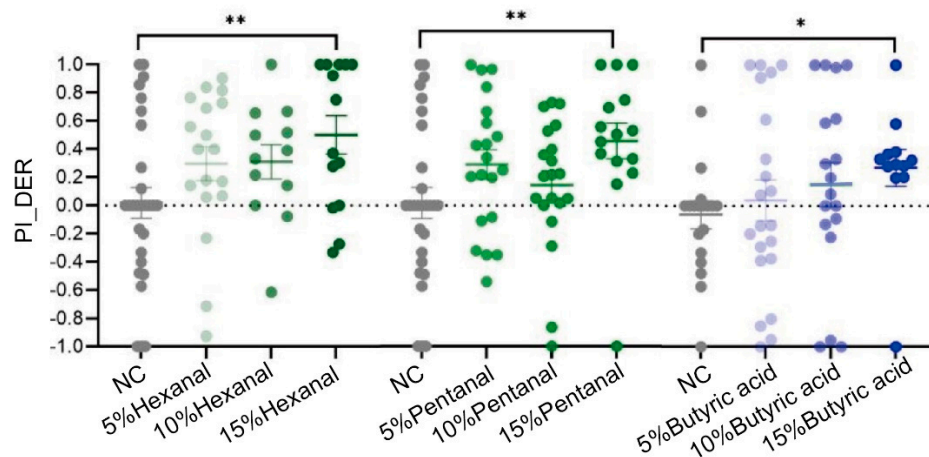

**Figure S2.** Dose-dependent behavioral curve of three plant volatiles. Three doses (5%, 10% and 15%, v/v) were tested. One-way ANOVA with Fisher's LSD multiple comparisons test, n=12-22. Error bars indicate SEM. \* p<0.05 and \*\* p<0.01.

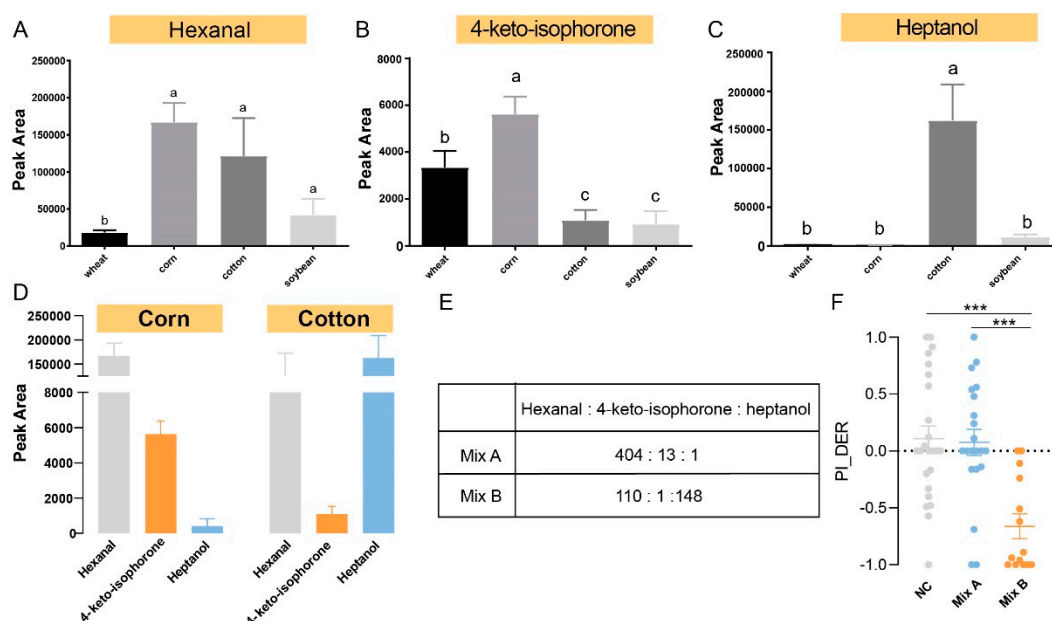

**Figure S3.** Quantification of plant volatiles by GC-MS. A-C: Peak area of hexanal (A), 4-keto-isophorone (B) and heptanol (C) released from host and non-host plants. One-way ANOVA followed by post hoc analysis with Fisher's LSD test. Error bars stands for SEM and n=4 for each chemical. D: Comparison of chemical quantity in corn and cotton. E: Mixtures prepared based on the natural ratio indicated in (D), as indicated with corn (Mix A) and cotton (Mix B). N=4 for each plants. F: PI\_DER of locusts to mixed compounds (15%, v/v). One-way ANOVA followed by post hoc analysis with Fisher's LSD test, n=14-24. \*\*\* p<0.001.

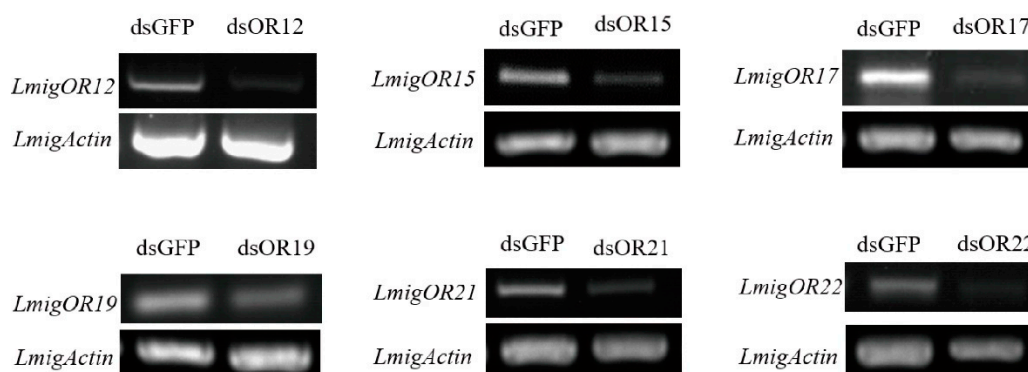

**Figure S4.** RNAi efficiency determined with RT-PCR.

**Table S1.** Details of odors used in the behavioral assays

| No. | Source            | Volatiles           | CAS No.   | Solvent      | Purity |
|-----|-------------------|---------------------|-----------|--------------|--------|
| 1   | Common            | Hexanal             | 66-25-1   | paraffin oil | 99%    |
| 2   | Common            | E-2-hexenal         | 6728-26-3 | paraffin oil | 99%    |
| 3   | Common            | Pentanal            | 110-62-3  | paraffin oil | 97%    |
| 4   | Host specific     | E-2-Pentenal        | 1576-87-0 | paraffin oil | 99%    |
| 5   | Host specific     | 2-methyl-2-pentenal | 623-36-9  | paraffin oil | 97%    |
| 6   | Host specific     | 4-keto-isophorone   | 1125-21-9 | paraffin oil | 99%    |
| 7   | Non-host specific | Heptanal            | 111-70-6  | paraffin oil | 99.5%  |
| 8   | Non-host specific | Heptanol            | 111-71-7  | paraffin oil | 95%    |
| 9   | Non-host specific | 2-octnone           | 111-13-7  | paraffin oil | 98%    |
| 10  | —                 | Butyric acid        | 107-92-6  | paraffin oil | 99%    |

**Table S2.** Primers used for RT-PCR and the Tm

| OR               | Accession number | Forward primer        | Reverse primer         | Tm     |
|------------------|------------------|-----------------------|------------------------|--------|
| <i>Lmig</i> OR12 | KP843312.1       | ATAGAAAACCAGCGAAAGCAA | ACAATATTCGTGCCTTCGTT   | 57.1°C |
| <i>Lmig</i> OR15 | KP843258.1       | GTCCAGATACCGCTGACGACT | TCGCTCTGGTTGATGACCCTC  | 59.1°C |
| <i>Lmig</i> OR17 | KP843365.1       | TCTACCTCTTCAGCACCGAC  | CCACACCAGCAGTAGAGGAA   | 60°C   |
| <i>Lmig</i> OR19 | KP843237.1       | GTCCATACGGTCTGTTCACCA | CCAGCATGTAATACTTCGGCTT | 57.4°C |
| <i>Lmig</i> OR21 | KP843321.1       | ACCTCTCGCTGTACGTGTC   | GTTCGTGCCCCGCCATAGCAAT | 57.1°C |
| <i>Lmig</i> OR22 | KP843252.1       | TGGTTCCCGTTCGACCCAGT  | GCCAGTGTCCCAAAGTCGCTCT | 59.1°C |

**Table S3.** Sequence of primers used in RNAi experiments

| Primer                 | Sequence (Red indicates T7 promoter sequence)   |
|------------------------|-------------------------------------------------|
| GFP-F                  | GGATCCTAATACGACTCACTATAGGCACAAGTTCAGCGTGTCCG    |
| GFP-R                  | GGATCCTAATACGACTCACTATAGGGTTCACCTTGATGCCGTTC    |
| T7- <i>Lmig</i> OR12-F | GGATCCTAATACGACTCACTATAGGCAGAGCGACTTCAAACC      |
| T7- <i>Lmig</i> OR12-R | GGATCCTAATACGACTCACTATAGGGCAAGGCTACACTCAAATAC   |
| T7- <i>Lmig</i> OR15-F | GGATCCTAATACGACTCACTATAGGCGTGCTCAACGACAACCTG    |
| T7- <i>Lmig</i> OR15-R | GGATCCTAATACGACTCACTATAGGAGTGGCGATGACTTGAAAC    |
| T7- <i>Lmig</i> OR17-F | GGATCCTAATACGACTCACTATAGGTCTACCTCTTCAGCACCGAC   |
| T7- <i>Lmig</i> OR17-R | GGATCCTAATACGACTCACTATAGGCCACACCAGCAGTAGAGGAA   |
| T7- <i>Lmig</i> OR19-F | GGATCCTAATACGACTCACTATAGGATTATGGACCACCAGGAA     |
| T7- <i>Lmig</i> OR19-R | GGATCCTAATACGACTCACTATAGGGTAGGAGTAAGAAGCGTTG    |
| T7- <i>Lmig</i> OR21-F | GGATCCTAATACGACTCACTATAGGTGGTTCCCGTTCGACCCAGT   |
| T7- <i>Lmig</i> OR21-R | GGATCCTAATACGACTCACTATAGGGCCAGTGTCCCAAAGTCGCTCT |
| T7- <i>Lmig</i> OR22-F | GGATCCTAATACGACTCACTATAGGGACGGCGGTGAAATGGTG     |
| T7- <i>Lmig</i> OR22-R | GGATCCTAATACGACTCACTATAGGGGCGGAGTAAAGCGTAGAATG  |
